# Supplementary material for: Host–guest system of a phosphorylated macrocycle assisting structure determination of oily molecules in single-crystal form
Source: Royal Society of Chemistry journal article supplement (doi:10.1039/d3sc02995f), 2023-01-01
Supplement: d3sc02995f1.pdf [file d3sc02995f1.pdf]

## Electronic Supporting Information

# Host-guest system of a phosphorylated macrocycle assisting structure determination of oily molecules in single-crystal form

Jianmin Jiao, Heng Li, Wang Xie, Yue Zhao, Chen Lin,\* Juli Jiang,\* and Leyong Wang\*

### Table of Contents

|                                                                         |     |
|-------------------------------------------------------------------------|-----|
| 1. Material and methods.....                                            | S2  |
| 2. Crystal cultivation.....                                             | S3  |
| 3. Crystallography data.....                                            | S4  |
| 4. Factors that determine whether to crystallize with CTX[P(O)Ph] ..... | S34 |
| 5. Electrostatic potential surface and IGMH analysis.....               | S35 |
| 6. Reference.....                                                       | S44 |
